# Supplementary material for: Reinforced conducting hydrogels prepared from the in situ polymerization of aniline in an aqueous solution of sodium alginate
Source: Royal Society of Chemistry journal article supplement (doi:10.1039/c4ta03332a), 2014-01-01
Supplement: c4ta03332a1.pdf [file c4ta03332a1.pdf]

*Electronic Supplementary Information (ESI) for:*

**Reinforced conducting hydrogels prepared from in-situ polymerization of aniline  
in an aqueous solution of sodium alginate**

Huabo Huang<sup>a</sup>, Xiaoping Zeng<sup>a</sup>, Wan Li<sup>a</sup>, Hong Wang<sup>b\*</sup>, Qin Wang<sup>a</sup>, Yajiang Yang<sup>a\*</sup>

<sup>a</sup> Key Laboratory for Large-Format Battery Materials and Systems, Ministry of Education, <sup>b</sup> School of Chemistry and Chemical Engineering, Huazhong University of Science and Technology, Wuhan 430074, China.

**Fig. S1** shows FT-IR spectra of sodium alginate (SA), dedoped polyaniline (PANI) and a PANI/SA hydrogel. In the spectrum of SA (**Fig. S1a**), the peaks at 3468, 1616, 1418, and 1031  $\text{cm}^{-1}$  are assigned to stretching vibrations of O–H,  $\text{–COO}^-$  (asymmetric),  $\text{–COO}^-$  (symmetric), and C–O–C, respectively.<sup>[1,2]</sup> In the spectrum of dedoped PANI (**Fig. S1b**), the peaks at 1584 and 1494  $\text{cm}^{-1}$  are assigned to C=C stretching vibrations of the quinonoid ring and benzenoid ring in the PANI, respectively. The peaks at 1308 and 1161  $\text{cm}^{-1}$  are assigned to C–N and C=N stretching vibrations in the PANI, respectively. The peak at 829  $\text{cm}^{-1}$  is assigned to bending vibrations of C–H (out-of-plane) in the benzene rings.<sup>[3]</sup> In the spectrum of the PANI/SA xerogel (**Fig. S1c**), almost all characteristic peaks of SA and PANI can be found, but the wave numbers are shifted. For example, the characteristic peak of  $\text{–COO}^-$  in SA shifts to a higher wave number from 1616 to 1721  $\text{cm}^{-1}$ ,<sup>[1]</sup> and the intensity is decreased. The reason can be attributed to the formation of ionic bonds, namely the complex formation between the protonated amino groups ( $\text{–NH}_2^+\text{–C}_6\text{H}_4\text{–}$ ) of PANI replacing the sodium ions of SA and SA chains. Thus, the charge density, radius and atomic weight of the cations were changed, resulting in a change of microenvironment around the  $\text{–COO}^-$  group and the consequent shifts of characteristic peaks.<sup>[1]</sup> In addition, the characteristic peak of C=N in PANI/SA also exhibited a red shift from 1161 to 1137  $\text{cm}^{-1}$  in comparison with dedoped PANI. It is also caused by the complex formation between PANI and SA, where C=N transforms to polarized  $\text{C=N}^+$ .<sup>[3]</sup> The FT-IR data confirm in-situ polymerization of An in the SA network and the complex formation between PANI and SA.

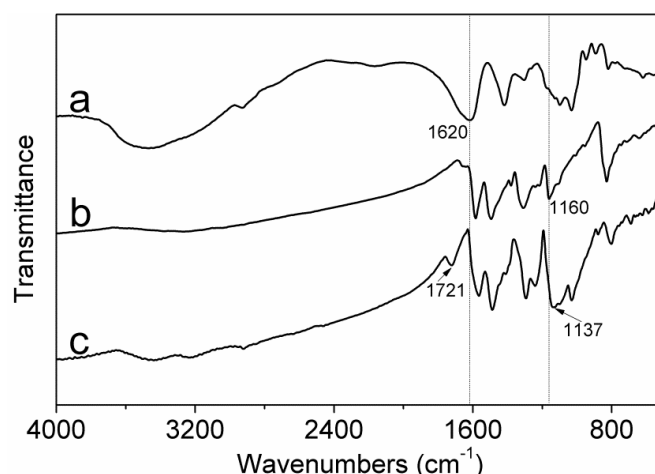

**Fig. S1** FT-IR spectra of SA (a), dedoped PANI (b) and PANI/SA xerogel (c).

[Fig. S2](#) shows the UV-vis spectra of SA, PANI/SA hydrogel and PANI/SA hydrogel treated with 1 mol/L of ammonium hydroxide. The SA does not show any obvious absorption band in the range of the test wavelengths (spectrum a). In the spectrum of PANI/SA hydrogel (spectrum b), three absorption bands at 300, 425, and ~800 nm are observed. Here, the band at 300 nm can be assigned to the  $\pi$ - $\pi^*$  transition of the benzene ring. The bands at 425 and 800 nm are assigned to the polaron band  $\pi$ - $\pi^*$  transition and the  $\pi$  to the localized polaron band of doped PANI, respectively.<sup>[2-4]</sup> When PANI/SA hydrogels were treated with ammonium hydroxide, the two bands at 425 and ~800 nm disappeared, but a new band appeared at 570 nm (spectrum c) which is a characteristic band of dedoped PANI.<sup>[5]</sup> The inserted photographs in [Fig. S2](#) show the color changes of three samples. The aqueous solution of SA (photograph a) is the colorless. PANI/SA hydrogel is emerald, implying a doped state of PANI. The PANI/SA hydrogel treated with ammonium hydroxide is violet, implying a dedoped state of PANI. These results suggest that in-situ polymerization and doping of An has occurred in SA. The resultant PANI exists in the SA hydrogel as the form of a conducting emeraldine salt.

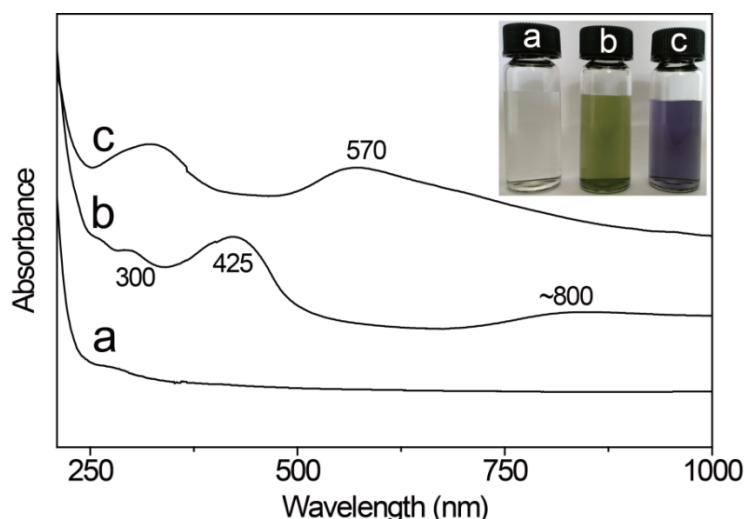

**Fig. S2** UV-Vis spectra of SA aqueous solutions (curve a), PANI/SA hydrogel (curve b) and PANI/SA hydrogel treated with ammonium hydroxide. The inserted optical photographs show the color changes of three samples.

**Fig. S3** shows XRD spectra of SA, PANI and PANI/SA xerogels. In the spectrum of SA (c), the peaks at  $2\theta = 13.5^\circ$  and  $21.4^\circ$  are assigned to the typical diffraction of SA, and the peak at  $31.8^\circ$  is assigned to the by-product of NaCl.<sup>[2]</sup> In the spectrum of PANI (a), the peaks at  $14.7^\circ$  and  $25.5^\circ$  are attributed to the periodicity perpendicular and parallel to the polymer chain, respectively. The peak at  $20.5^\circ$  is caused by the layers of the polymer chains at alternating distances.<sup>[2]</sup> The XRD spectrum of the PANI/SA xerogel (spectrum b) is similar to that of PANI, but all characteristic peaks are broadened. The peak at  $20.5^\circ$  shifted to a lower position. These changes are likely a result from the intermolecular interactions between PANI and SA.

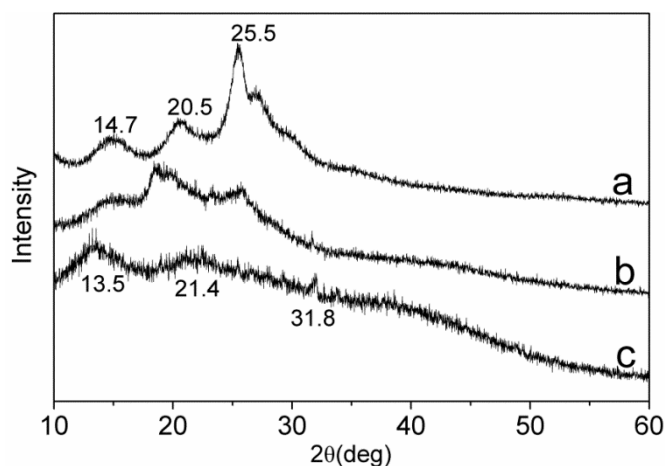

**Fig. S3** X-ray diffraction patterns of PANI (a), PANI/SA xerogel (b), and SA (c).

## References

- 1 Y. Yu, S. Zhihuai, S. Chen, C. Bian, W. Chen and G. Xue, *Langmuir*, 2006, **22**, 3899-3905.
- 2 Y. Li, X. Zhao, Q. Xu, Q. Zhang and D. Chen, *Langmuir*, 2011, **27**, 6458-6463.
- 3 S. Adhikari and P. Banerji, *Synthetic Met.*, 2009, **159**, 2519-2524.
- 4 T. Hino, T. Namiki and N. Kuramoto, *Synthetic Met.*, 2006, **156**, 1327-1332.
- 5 H. Fan, H. Wang, N. Zhao, X. Zhang and J. Xu, *J. Mater. Chem.*, **2012**, 22, 2774-2780.
